## RESEARCH ARTICLE

# External validation of a multi-biomarker-based score for predicting risk of cardiovascular disease in patients with rheumatoid arthritis

Eric H. Sasso<sup>1,2</sup>\*, Brent Mabey<sup>2</sup>, Darl D. Flake, II<sup>2</sup>, Elena Hitraya<sup>1,2</sup>, Cheryl L. Chin<sup>1,2</sup>, Rotem Ben-Shachar<sup>2</sup>, Alexander Gutin<sup>2</sup>, Jerry S. Lanchbury<sup>2</sup>, Jeffrey R. Curtis<sup>3</sup>

**1** Medical and Scientific Affairs, Crescendo Bioscience, South San Francisco, CA, United States of America, **2** Myriad Genetics Laboratories, Myriad, Salt Lake City, UT, United States of America, **3** Division of Clinical Immunology and Rheumatology, University of Alabama at Birmingham, Birmingham, AL, United States of America

\* These authors contributed equally to this work.

\* [esasso@uw.edu](mailto:esasso@uw.edu)

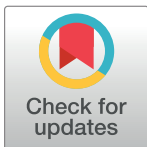

## OPEN ACCESS

**Citation:** Sasso EH, Mabey B, Flake DD, II, Hitraya E, Chin CL, Ben-Shachar R, et al. (2024) External validation of a multi-biomarker-based score for predicting risk of cardiovascular disease in patients with rheumatoid arthritis. *PLoS ONE* 19(5): e0296459. <https://doi.org/10.1371/journal.pone.0296459>

**Editor:** Mohammad Movahedi, University of Toronto, CANADA

**Received:** June 20, 2023

**Accepted:** December 13, 2023

**Published:** May 6, 2024

**Copyright:** © 2024 Sasso et al. This is an open access article distributed under the terms of the [Creative Commons Attribution License](https://creativecommons.org/licenses/by/4.0/), which permits unrestricted use, distribution, and reproduction in any medium, provided the original author and source are credited.

**Data Availability Statement:** The data for this study were sourced from the Symphony database, which operates under a commercial license. As such, the dataset is not publicly accessible and restrictions prevent the authors from sharing it. However, interested researchers have the option to license the dataset independently and reproduce the analysis. Inquiries for data access can be directed to the licensing company via their official website (Link: <https://www.iconplc.com/solutions/technologies/symphony-health>).

## Abstract

### Background

A multi-biomarker disease activity (MBDA)-based cardiovascular disease (CVD) risk score was developed and internally validated in a Medicare cohort to predict 3-year risk for myocardial infarction (MI), stroke or CVD death in patients with rheumatoid arthritis (RA). It combines the MBDA score, leptin, MMP-3, TNF-R1, age and four clinical variables. We are now externally validating it in a younger RA cohort.

### Methods

Claims data from a private aggregator were linked to MBDA test data to create a cohort of RA patients  $\geq 18$  years old. A univariable Cox proportional hazards regression model was fit using the MBDA-based CVD risk score as sole predictor of time-to-a-CVD event (hospitalized MI or stroke). Hazard ratio (HR) estimate was determined for all patients and for clinically relevant subgroups. A multivariable Cox model evaluated whether the MBDA-based CVD risk score adds predictive information to clinical data.

### Results

49,028 RA patients (340 CVD events) were studied. Mean age was 52.3 years; 18.3% were male. HR for predicting 3-year risk of a CVD event by the MBDA-based CVD risk score in the full cohort was 3.99 (95% CI: 3.51–4.49,  $p = 5.0 \times 10^{-95}$ ). HR were also significant for subgroups based on age, comorbidities, disease activity, and drug use. In a multivariable model, the MBDA-based CVD risk score added significant information to hypertension, diabetes, tobacco use, history of CVD, age, sex and CRP (HR = 2.27,  $p = 1.7 \times 10^{-7}$ ).

**Funding:** This work was supported by Myriad Genetics, Inc. The funders had no role in study design, data collection and analysis, decision to publish, or preparation of the manuscript. Dr. Curtis received support from NIAMS P30.

**Competing interests:** I have read the journal's policy and the authors of this manuscript have the following competing interests: ES, BM, DDFII, EH, CLC, RB-S, AG, and JSL are or were employed by Myriad Genetics during the conduct of the study and received salaries and may have received stock grants/options as compensation. EH has been employed by Labcorp. JC received grants or contracts from Abbvie, Amgen, BMS, Corevitas, Janssen, Lilly, Novartis, Myriad, Pfizer, Sanofi, Setpoint, Scipher, and UCB and received consulting fees from Abbvie, Amgen, BMS, Corevitas, Janssen, Lilly, Novartis, Myriad, Pfizer, Sanofi, Setpoint, Scipher, and UCB. This does not alter our adherence to PLOS ONE policies on sharing data and materials.

**Abbreviations:** ACEI, angiotensin converting enzyme inhibitor; ARB, angiotensin receptor blocker; csDMARD, conventional synthetic disease modifying antirheumatic drug; CVD, cardiovascular disease; CRP, C-reactive protein; HR, hazard ratio; IQR, interquartile range; ln, natural logarithm; MBDA, multi-biomarker disease activity (adjusted); MMP-3, matrix metalloproteinase 3; NSAID, non-steroidal anti-inflammatory drug; PY, patient-years; RA, rheumatoid arthritis; SD, standard deviation; TNFi, tumor necrosis factor inhibitor; TNF-R1, tumor necrosis factor receptor 1.

## Conclusion

The MBDA-based CVD risk score has been externally validated in an RA cohort that is younger than and independent of the Medicare cohort that was used for development and internal validation.

## Background

Cardiovascular disease (CVD) accounts for 30–40% of deaths among patients with rheumatoid arthritis (RA) and is their leading cause of mortality [1]. CVD incidence among RA patients is 50% greater than in the general population [2]. Cardiovascular risk calculators developed for the general population tend to underestimate CVD risk for RA patients [3–5], leading the European League Against Rheumatism to recommend that CVD risk estimates from conventional calculators be multiplied by 1.5 for RA patients [3]. This adjustment does not account for the effect of RA inflammation, which varies between patients and can meaningfully increase the risk for atherosclerosis and CVD events.

To improve CVD risk prediction for RA patients, a CVD risk score based on clinical information and the multi-biomarker disease activity (MBDA) blood test has been developed [6]. The MBDA test provides a validated score for assessing and monitoring RA disease activity, based on measurements of 12 serum biomarkers [7]. In 2019, the American College of Rheumatology disease activity measures working group concluded that the MBDA score was one of the measures of RA disease activity that met the minimum standard for regular use [8]. The MBDA-based CVD risk score combines the MBDA score with three of its biomarkers (leptin, MMP-3 and TNF-R1), age, and four traditional clinical CVD risk factors (diabetes, hypertension, tobacco use and history of a high-risk cardiovascular condition) to predict the 3-year risk for myocardial infarction (MI), stroke or CVD death in patients with RA [6].

The MBDA-based CVD risk score was developed and internally validated in a cohort of 30,751 RA patients in the US that was created by linking Medicare administrative data with MBDA test results [6]. Comorbidity rates were high in this cohort, as 77% of the patients were at least 65 years old. The MBDA-based CVD risk score was also internally validated in subgroups of Medicare patients, including those who were <65 years old, lacked comorbidities or were already receiving statins.

Many rheumatologists do not routinely assess RA disease activity quantitatively or formally evaluate non-rheumatologic CVD risk factors. These barriers may be overcome if, as a routine part of MBDA testing, the MBDA-based CVD risk score were to be generated automatically by the MBDA laboratory after it measures the MBDA biomarker concentrations and produces an MBDA score. Rheumatologists may then find the MBDA-based CVD risk score easier to use than conventional CVD risk scores because it would not require them to assess cholesterol or other clinical measures or perform any calculations.

In view of this potential opportunity to streamline CVD risk assessment in RA by using the MBDA-based CVD risk score, we conducted the present analysis of commercial claims data from private payors in the US to provide an independent, external validation of the MBDA-based CVD risk score in a younger, non-Medicare cohort.

## Methods

### Data source

A retrospective cohort was created by using all available fee-for-service data from a population of RA patients who had received MBDA testing as part of routine care and for whom records

for medical and pharmaceutical claims were available. Medical and pharmaceutical claims data came from the Integrated Dataverse<sup>®</sup> of Symphony Health (Phoenix, AZ, USA), which longitudinally assembles data from medical, hospital and prescription claims, point-of-sale prescription data, non-retail invoice data and demographic data (<https://symphonyhealth.prahs.com/what-we-do/view-health-data>). MBDA test results came from a commercial database (Vectra<sup>®</sup>, Crescendo Bioscience, Inc., South San Francisco, CA, USA; subsequently owned by Myriad Genetics Laboratories, Salt Lake City, UT, USA), followed by LabCorp (Burlington, NC, USA). For this study, MBDA data from September 30, 2010 to April 30, 2018 were sent to Symphony Health, where matched medical and pharmaceutical claims data from January 1, 2011 to December 31, 2017 were linked to MBDA test data and sent to the authors as a deidentified dataset. The data in the de-identified, linked dataset that was analyzed here had been collected independently of and prior to this study, by individuals other than the investigators, from individuals who were not identifiable by the investigators. Based on 45 CFR 46.102(e) [1–6], the study was exempted from human subjects review.

### Eligibility criteria

Patients were considered for inclusion if they had received  $\geq 1$  MBDA test and had any medical and pharmaceutical claims data available from  $\geq 365$  days before the date of the qualifying MBDA test (see below). For a patient to be included, the linked database had to: 1) contain a diagnosis of RA by a rheumatologist, using International Statistical Classification of Diseases and Related Health Problems (ICD) diagnosis codes, 9<sup>th</sup> or 10<sup>th</sup> revision (ICD9 714.0; ICD10 M05.\*, M06.\*, excluding M06.4 and M06.1, with \* representing any number of digits or characters), before the qualifying MBDA test date and 2) indicate receipt of an RA-specific treatment (TNF-inhibitor, abatacept, rituximab, anti-IL-6R, Janus kinase inhibitor, conventional synthetic disease-modifying anti-rheumatic drug [csDMARD] including methotrexate, sulfasalazine, leflunomide and hydroxychloroquine) on or before the MBDA test date.

A patient was excluded if they had listed Medicare insurance on their MBDA test requisition form, to avoid overlap with the cohort used to develop the MBDA-based CVD risk score; or if their MBDA tests were all excluded, based on any of the following criteria: 1) hospitalization during the 14 days before the test date, 2) anti-IL-6R therapy received during the 90 days on or before the test date [9], 3) malignant neoplasm (except non-melanoma skin cancer)  $\leq 365$  days before the test date, or 4) CVD event (defined below) before the test date. For patients with multiple MBDA tests, the earliest qualifying test was used.

### CVD outcome

The outcome for validating the MBDA-based CVD risk test was a hospitalized CVD event, defined as a hospital claim for MI or stroke, based on ICD-9 or ICD-10 codes (S1 Table). CVD death information was unavailable in this data source and was not part of the composite outcome. The endpoint used to analyze the composite outcome was time from MBDA testing to first CVD event. Follow-up for each patient spanned from the qualifying MBDA test date to the earliest of: 1) first CVD event, 2) malignant neoplasm (except non-melanoma skin cancer), 3) three years after MBDA testing, or 4) date of the last medical or pharmaceutical claim.

### MBDA-based CVD risk score

**Clinical variables.** Clinical variables in the MBDA-based CVD risk score are age at the time of qualifying MBDA test, obtained from the MBDA database; and diagnoses of diabetes, hypertension, tobacco use (past or present) and history of CVD other than MI or stroke, based on nine CV diagnoses established previously [6]. Each diagnosis was considered present or

absent based on diagnostic codes in medical and hospital claims on or before the MBDA test date (S1 Table).

**Molecular variables.** Molecular variables in the MBDA-based CVD risk score are: leptin, MMP-3, TNF-R1 and the MBDA score. The MBDA score measures RA disease activity with 12 protein biomarkers (EGF, VEGF-A, MMP-1, MMP-3, TNF-R1, VCAM-1, SAA, YKL-40, CRP, IL-6, leptin and resistin), using a validated algorithm to give an integer score on a scale of 1 to 100 with categories of Low (<30), Moderate (30–44) and High ( $\geq 45$ ) [7]. All MBDA tests used in this study were ordered as part of routine patient care, with testing performed in a Clinical Laboratory Improvements Amendment-certified commercial laboratory in South San Francisco, CA, USA (Crescendo Bioscience). Values for leptin, MMP-3, TNF-R1 and CRP came from MBDA tests.

Since 2017, the original MBDA score has been routinely adjusted for age, sex, and adiposity [10]. The adjusted MBDA score has the same scale, categories and minimally important difference (8 units) as the original MBDA score [10]. Original MBDA scores were converted to adjusted scores for this study. Hereafter, “MBDA score” means the adjusted MBDA score.

#### The MBDA-based CVD risk score algorithm.

*MBDA based CVD risk score*

$$= 0.031441 \times \text{age} + 0.273186 \times \text{diabetes} + 0.269370 \times \text{hypertension} + 0.269117 \times \text{smoking} + 0.337822 \times \text{CVD History} - 0.171106 \times \ln(\text{Leptin}) + 0.145355 \times \ln(\text{MMP3}) + 0.572441 \times \ln(\text{TNFRI}) + 1.607582 \times \tanh(\text{MBDA}/33.08073).$$

Age is in years, leptin, MMP-3, and TNF-R1 are in ng/mL, ln means natural logarithm and tanh represents hyperbolic tangent transformation [6]. Having leptin, MMP-3 and TNF-R1 as separate variables in the MBDA-based CVD risk score and as components within the MBDA score is non-redundant because the algorithm for the MBDA score is a weighted, non-linear combination of its component biomarkers, which were originally neither selected nor weighted for CVD risk prediction [6, 7, 10]. A separate formula that converts the MBDA-based CVD risk score into predicted 3-year risk for a CVD event as a percentage value [6] was not used here.

## Statistical analysis

**Objectives.** The pre-defined primary objective was to validate the MBDA-based CVD risk score as a predictor of CVD events. Secondary objectives included validating the score in patients <65 years old and evaluating whether the MBDA-based CVD risk score adds prognostic information to clinical variables.

Symphony Health estimates that the Integrated Dataverse includes approximately 60% of medical claims, 60% of mail order pharmaceutical claims and 81% of retail pharmaceutical claims (data on file). Assuming that the Integrated Dataverse misses data randomly, the relationships between CVD event rates and molecular, clinical and other variables should be more reliable than absolute event rates. The present analyses thus focused on predicting relative risk of a CVD event rather than absolute risk.

**Validation.** A univariable Cox proportional hazards regression model was fit by using the MBDA-based CVD risk score as the sole predictor of time to a CVD event. The hazard ratio (HR) estimate was determined, with p-value and 95% confidence interval based on the partial likelihood ratio test (LRT). This methodology was also used in patients <65 years old and  $\geq 40$  years old and in exploratory analyses for other subgroups based on molecular, clinical, therapeutic and demographic features. To determine if HR differed between complementary

subgroups, p-value was determined using the partial LRT, with Bonferroni correction for multiple comparisons.

A multivariable Cox model was fit using the following covariates to predict time to CVD event: MBDA-based CVD risk score, age, sex, CRP (natural log transformed), diabetes yes/no (Y/N), hypertension Y/N, history of other CVD Y/N and tobacco use Y/N. HR and LRT-based p-value were reported for the MBDA-based CVD risk score after accounting for all other variables in the multivariable model.

Analyses were performed using R (version 3.5.1) and the survival (version 3.1–8) package [11, 12].

## Results

A total of 49,028 RA patients with 340 CVD events (165 MIs and 175 strokes) met eligibility criteria (S2 Table). Mean age was 52.3 years, 18.3% of patients were male (Table 1). Hypertension (39.1%), hyperlipidemia (38.2%) and diabetes (16.3%) were the most frequent CVD-related co-morbidities (Table 1). Use of csDMARDs and biologics was similar among patients with and without a CVD event.

Total follow-up time was 93,514 patient-years (PY), with median (interquartile range) follow-up duration of 24.4 (12.2–36.0) months. The overall observed CVD event rate was 3.6 events/1000 PY.

### Validation of the MBDA-based CVD risk score

The MBDA-based CVD risk score was a significant predictor of 3-year CVD risk in univariable analysis, with HR of 3.97 (95% CI: 3.51–4.49,  $p = 5.0 \times 10^{-95}$ ) (Fig 1), indicating that for every one-unit increase in the risk score, CVD risk was approximately four times as large. For the patients <65 years old ( $N = 44,525$  with 218 CVD events), HR was 4.23 (95% CI: 3.51–5.09,  $p = 6.4 \times 10^{-48}$ ). For patients  $\geq 40$  years old ( $N = 42,308$  with 329 CVD events), HR was 4.00 (95% CI: 3.52–4.55,  $p = 1.1 \times 10^{-85}$ ). For patients 65 to 74 years old, HR was 3.17 (Fig 1), which resembles the 2.89 value observed previously in the overall Medicare cohort, with a mean age of 69 years [6].

HRs for the MBDA-based CVD risk score were statistically significantly and markedly  $>1.0$  for nearly all subgroups of interest, with most HRs being between 3.0 and 4.5 (Fig 1). Results for subgroups with small event numbers, such as patients <40 years old and patients receiving non-TNFi biologics, should be interpreted with caution. HRs were generally similar between complementary subgroups, such as patients with and without diabetes, with none being statistically significantly different following correction for multiple testing (Fig 1). In these comparisons of HRs of complementary subgroups, a higher HR does not mean greater CVD risk. Rather, it means that, for any increase in MBDA-based CVD risk score, CVD risk increases more for patients in the subgroup with the greater HR than in the complementary subgroup.

When a multivariable model was fit with the MBDA-based CVD risk score and seven demographic or clinical CVD risk factors (age, sex, CRP, diabetes, hypertension, history of other CVD, and tobacco use), the MBDA-based CVD risk score added significant, independent predictive information to the model, with an HR of 2.27 (95% CI: 1.68–3.06,  $p = 1.7 \times 10^{-7}$ ) (Table 2). Within this model, leptin, MMP-3, TNF-R1 and the MBDA score are unique to the MBDA-based CVD risk score. Thus, this result indicates that biomarker information in the MBDA-based CVD risk score contributes prognostic information that was not captured by the ensemble of conventional CVD risk factors in the model.

Table 1. Patient characteristics at baseline\*.

| Characteristic                   | Complete cohort  | Patients with CVD event | Patients with no CVD event |
|----------------------------------|------------------|-------------------------|----------------------------|
|                                  | N = 49,028       | N = 340                 | N = 48,688                 |
| Age, mean (SD)                   | 52.3 (11.2)      | 61.6 (11.6)             | 52.2 (11.2)                |
| <b>Age group, %</b>              |                  |                         |                            |
| <40 years                        | 6,720 (13.7%)    | 11 (3.2%)               | 6,709 (13.8%)              |
| 40–64 years                      | 37,805 (77.1%)   | 207 (60.9%)             | 37,598 (77.2%)             |
| 65–74 years                      | 3466 (7.1%)      | 66 (19.4%)              | 3400 (7.0%)                |
| ≥75 years                        | 1037 (2.1%)      | 56 (16.5%)              | 981 (2.0%)                 |
| <b>Male, N (%)</b>               | 8972 (18.3%)     | 105 (30.9%)             | 8867 (18.2%)               |
| <b>Comorbidities, N (%)</b>      |                  |                         |                            |
| Diabetes                         | 8002 (16.3%)     | 133 (39.1%)             | 7869 (16.2%)               |
| History of CVD                   | 6730 (13.7%)     | 151 (44.4%)             | 6579 (13.5%)               |
| Hyperlipidemia                   | 18,731 (38.2%)   | 209 (61.5%)             | 18,522 (38.0%)             |
| Hypertension                     | 19,189 (39.1%)   | 247 (72.6%)             | 18,942 (38.9%)             |
| Tobacco use (past or current)    | 7517 (15.3%)     | 104 (30.6%)             | 7413 (15.2%)               |
| <b>Medications, N (%)</b>        |                  |                         |                            |
| ACEI                             | 6099 (12.4%)     | 87 (25.6%)              | 6012 (12.3%)               |
| ARB                              | 4478 (9.1%)      | 58 (17.1%)              | 4420 (9.1%)                |
| Beta-blockers                    | 6397 (13.0%)     | 97 (28.5%)              | 6300 (12.9%)               |
| Statins                          | 5815 (11.9%)     | 85 (25.0%)              | 5730 (11.8%)               |
| <b>RA medications, N (%)</b>     |                  |                         |                            |
| Methotrexate                     | 21,798 (44.4%)   | 153 (45%)               | 21,645 (44.4%)             |
| Other csDMARDs                   | 16,436 (33.5%)   | 120 (35.3%)             | 16,316 (33.5%)             |
| TNFi biologics                   | 11,370 (23.2%)   | 73 (21.5%)              | 11,297 (23.2%)             |
| Non-TNFi biologics               | 3374 (6.9%)      | 21 (6.2%)               | 3353 (6.9%)                |
| Abatacept                        | 1841 (3.8%)      | 10 (2.9%)               | 1831 (3.8%)                |
| Rituximab                        | 402 (0.8%)       | 4 (1.2%)                | 398 (0.8%)                 |
| Tocilizumab                      | 179 (0.4%)       | 3 (0.9%)                | 176 (0.4%)                 |
| Tofacitinib                      | 1038 (2.1%)      | 5 (1.5%)                | 1033 (2.1%)                |
| Oral Glucocorticoids             | 24,154 (49.3%)   | 196 (57.6%)             | 23,958 (49.2%)             |
| NSAIDs                           | 13,327 (27.2%)   | 104 (30.6%)             | 13,223 (27.2%)             |
| <b>Biomarkers†, median (IQR)</b> |                  |                         |                            |
| Leptin, (ng/ml)                  | 24.3 (10.6–47.1) | 23.7 (9.1–47.8)         | 24.3 (10.6–47.1)           |
| MMP-3, (ng/ml)                   | 21.1 (14.2–36.3) | 28.7 (18.7–57.1)        | 21.0 (14.2–36.1)           |
| TNF-R1, (ng/ml)                  | 1.4 (1.1–1.7)    | 1.8 (1.4–2.7)           | 1.4 (1.1–1.7)              |
| CRP (mg/L)                       | 4.1 (1.4–11.6)   | 6.3 (2.1–16.7)          | 4.1 (1.4–11.5)             |
| <b>MBDA score, median (IQR)</b>  | 40 (31–48)       | 44 (34–52)              | 40 (31–48)                 |

\*Based on diagnostic codes and administration and fill information in the baseline period (see [Methods](#)).

†Biomarker concentrations are from the MBDA test. Leptin, MMP-3 and TNF-R1 values are natural log transformed.

CVD event is hospitalized myocardial infarction or stroke in the three years from the date of the baseline MBDA score.

ACEI, angiotensin converting enzyme inhibitor; ARB, angiotensin receptor blocker; csDMARD, conventional synthetic disease modifying antirheumatic drug; CVD, cardiovascular disease; IQR, interquartile range; MBDA, MMP-3, matrix metalloproteinase protein 3; multi-biomarker disease activity (adjusted); NSAID, non-steroidal anti-inflammatory drug; SD, standard deviation; TNFi, tumor necrosis factor inhibitor; TNF-R1, TNF receptor 1.

<https://doi.org/10.1371/journal.pone.0296459.t001>

## Discussion

An MBDA-based CVD risk score that combines molecular, clinical and demographic features to provide a personalized assessment of CVD risk for patients with RA was previously



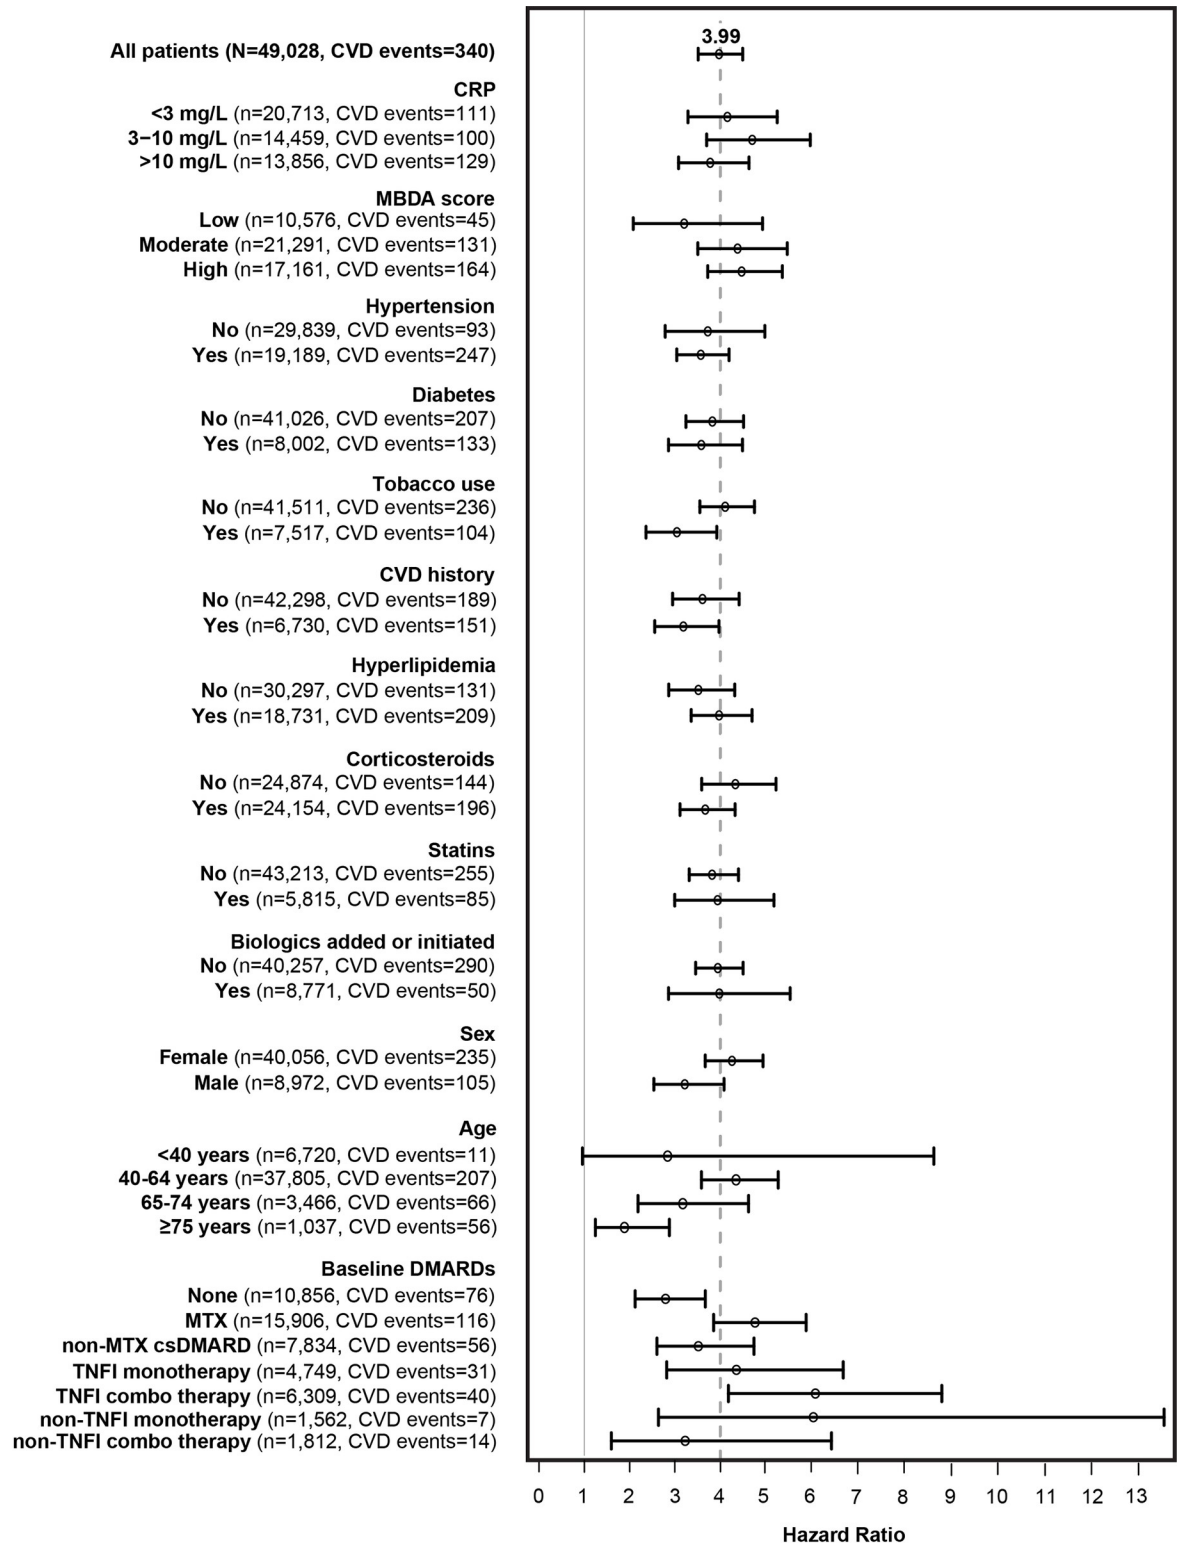

**Fig 1. Validation of MBDA-based CVD risk score for predicting CVD risk in subgroups.** Results show hazard ratios (HRs) with 95% confidence intervals. Subgroupings are based on information from baseline period, except Biologic initiation or change, which is based on treatment changes during follow-up. Vertical lines indicate HRs of 1.0 (solid line) and 3.99 (dashed line). All HRs are statistically significantly >1.0, except for the <40-year-old subgroup. Comparisons between complementary subgroups all have  $p > 0.05$  except for Hypertension ( $p = 0.046$ ), Sex ( $p = 0.046$ ), Baseline drug use ( $p = 0.012$ ) and Age ( $p = 0.005$ ), which are each non-significant after

Bonferroni correction for 13 comparisons (i.e.,  $p > 0.0038$  [0.05/13]). For baseline RA drugs, the Methotrexate (MTX) category includes combinations with conventional synthetic DMARDs (csDMARDs); the non-MTX csDMARD category excludes combinations with MTX, and the non-TNF inhibitor (TNFi) monotherapy (mono); and combination therapy (combo) categories include Janus kinase inhibitors.

<https://doi.org/10.1371/journal.pone.0296459.g001>

developed and internally validated in a predominantly elderly cohort of Medicare patients. Only 23% of those patients were <65 years old, of whom most had disability [6]. We have now externally validated the MBDA-based CVD risk score in an independent RA cohort that was younger and had lower rates of comorbidities than the Medicare cohort. We also validated the MBDA-based CVD risk score in several subgroups, based on comorbidities, drug use and level of inflammatory disease activity. In addition, we showed that the risk score improved the predictive ability of a simpler, clinically-based model. This study thus supports the MBDA-based CVD risk score as a feasible tool that objectively evaluates inflammatory disease activity to assess CVD risk in a heterogeneous RA patient population.

Previously, the MBDA-based CVD risk score was developed and internally validated for RA patients  $\geq 40$  years old, to align with ACC/AHA guidelines [6, 13]. The present cohort included RA patients  $\geq 18$  years old to validate the MBDA-based CVD risk score in the age range of patients who may receive the MBDA test, which is required to calculate the MBDA-based CVD risk score. For completeness, the MBDA-based CVD risk score was also validated in patients  $\geq 40$  years old and patients <65 years old. These analyses thus expand the overall age range in which the MBDA-based CVD risk score has been studied while also validating it in the same age group that was used for internal validation in the Medicare cohort.

The present cohort was created by linking the MBDA database to clinical data from a large administrative database, the Integrated Dataverse of Symphony Health. A limitation of this cohort is that neither non-RA patients nor RA patients who had not received MBDA testing could be studied because MBDA testing is only for RA patients and MBDA test data are required for the MBDA-based CVD risk score. The Symphony database does not capture all claims for all patients, and it does not contain information on cardiovascular death, which is part of the composite outcome the MBDA-based CVD risk score was designed to predict. The lack of CVD death data probably did not meaningfully affect the accuracy of CVD event rates in this study because CVD death comprised only 6.9% of CVD events in the Medicare database used previously, and it may comprise a smaller portion in the younger cohort used here. We do not expect the missingness of data in Symphony to be related to MBDA-based CVD risk

**Table 2. Univariable and multivariable analyses of the MBDA-based CVD risk score and conventional CVD risk factors as predictors of risk for a CVD event.**

| Variable                  | Univariable Analyses |                       | Multivariable Model |                      |
|---------------------------|----------------------|-----------------------|---------------------|----------------------|
|                           | HR (95% CI)          | P-value               | HR (95% CI)         | P-value              |
| Age                       | 1.08 (1.07, 1.09)    | $6.4 \times 10^{-53}$ | 1.02 (1.01, 1.04)   | 0.007                |
| Sex (male)                | 2.02 (1.60, 2.54)    | $1.3 \times 10^{-8}$  | 1.17 (0.92, 1.49)   | 0.204                |
| Ln (CRP)                  | 1.19 (1.11, 1.28)    | $8.2 \times 10^{-7}$  | 0.98 (0.90, 1.06)   | 0.580                |
| Hypertension              | 4.01 (3.16, 5.09)    | $1.6 \times 10^{-34}$ | 1.37 (1.04, 1.81)   | 0.025                |
| Smoking                   | 2.77 (2.20, 3.49)    | $1.3 \times 10^{-15}$ | 1.69 (1.32, 2.18)   | $6.7 \times 10^{-5}$ |
| Diabetes                  | 3.37 (2.71, 4.19)    | $1.7 \times 10^{-24}$ | 1.41 (1.10, 1.80)   | 0.007                |
| CVD History               | 5.22 (4.22, 6.47)    | $1.1 \times 10^{-44}$ | 1.56 (1.19, 2.04)   | 0.001                |
| MBDA-based CVD risk score | 3.99 (3.51–4.49)     | $4.4 \times 10^{-95}$ | 2.27 (1.68, 3.06)   | $1.7 \times 10^{-7}$ |

Cardiovascular disease (CVD) event is defined as hospitalized event or stroke in the three years following the baseline MBDA score. CRP, C-reactive protein; HR, hazard ratio; ln, natural logarithm.

<https://doi.org/10.1371/journal.pone.0296459.t002>



scores. Thus, while the absolute incidence rate of CVD events in our cohort,  $\sim 4/1000$  PY, is lower than might be expected [14], co-morbidity rates resembled those seen elsewhere [15] and the HR values in Fig 1, being assessments of relative risk, should be unbiased with respect to the MBDA-based CVD risk score.

A limitation of this study is that the MBDA-based CVD risk score could not be compared to conventional CVD risk calculators, such as the Framingham Risk Score or the pooled cohort risk equation of the American College of Cardiology and American Heart Association, because the clinical measurements they require are not available in the Symphony claims database. Instead, we created a multivariable model that combined age, sex, CRP and four clinical diagnosis variables – each weighted optimally for CVD risk prediction in the current cohort – with the MBDA-based CVD risk score included in the model as an additional variable. The MBDA-based CVD risk score added significant information to this model, indicating that biomarker-based information in the MBDA-based CVD risk score, which represents RA inflammation, contributed prognostic information that was not captured by the seven clinically-based variables, which included CRP.

Other models have been developed to predict risk for CVD events in RA patients. The Expanded Cardiovascular Risk Prediction Score (ERS-RA), which predicts 10-year CVD risk and has been externally validated [16, 17], combines six demographic/CVD-related factors, many of which are also in the MBDA-based risk prediction score, with 4 RA-related variables, including the Clinical Disease Activity Index (CDAI) to assess disease activity and the Health Assessment Questionnaire (HAQ), for disability. The Trans-Atlantic Cardiovascular Risk Consortium for Rheumatoid Arthritis (ATACC-RA) developed two models predicting 10-year CVD risk that require serum lipid measurements and account for RA-related effects with the 28-joint Disease Activity Score with erythrocyte sedimentation rate (DAS28-ESR) or the HAQ, respectively [18]. More recently, another group developed and externally validated models for 2-year risk for MI and for stroke in RA patients who are initiating first-line methotrexate monotherapy, using 64 and 90 predictor variables, respectively, but no clinical measures [19]. The MBDA-based CVD risk score uses nine variables and requires no RA-related clinical measures and no blood test results, except from the MBDA test. If the MBDA-based CVD risk score were to be automatically calculated by the MBDA laboratory at the time of MBDA testing, it may provide rheumatologists a practical way to assess CVD risk for their RA patients.

## Conclusions

In conclusion, we have externally validated the MBDA-based CVD risk score in an independent cohort that is younger than the Medicare cohort that was used for test development. The score was shown to discriminate 3-year CVD risk among patients  $>18$  years old,  $\geq 40$  years old or  $<65$  years old, and in various clinical subgroups. These results support the feasibility and potential utility of using biomarker measurements to personalize CVD risk assessment according to the level of RA inflammation.

## Supporting information

**S1 Table. Diagnosis codes used to identify cardiovascular events and CVD risk factors in the linked database.** \* Represents any number of digits or characters. †See reference [6] (Curtis et al, 2020). CVD, cardiovascular disease; ICD, International Statistical Classification of Diseases and Related Health Problems, MI, myocardial infarction. (DOCX)

**S2 Table. Cohort derivation.** \* Represents any number of digits or characters. †See reference [6] (Curtis et al, 2020). CVD, cardiovascular disease; ICD, International Statistical Classification of Diseases and Related Health Problems, MI, myocardial infarction. (DOCX)

## Acknowledgments

The authors thank Brooke Hullinger, JD for her assistance editing the manuscript and preparing the tables and graphs.

## Author Contributions

**Conceptualization:** Eric H. Sasso, Brent Mabey, Darl D. Flake, II, Elena Hitraya, Cheryl L. Chin, Rotem Ben-Shachar, Alexander Gutin, Jerry S. Lanchbury, Jeffrey R. Curtis.

**Data curation:** Brent Mabey, Darl D. Flake, II.

**Formal analysis:** Eric H. Sasso, Brent Mabey, Darl D. Flake, II, Elena Hitraya, Cheryl L. Chin, Alexander Gutin, Jerry S. Lanchbury, Jeffrey R. Curtis.

**Methodology:** Eric H. Sasso, Brent Mabey, Darl D. Flake, II, Rotem Ben-Shachar, Alexander Gutin, Jerry S. Lanchbury, Jeffrey R. Curtis.

**Writing – original draft:** Eric H. Sasso, Jeffrey R. Curtis.

**Writing – review & editing:** Brent Mabey, Darl D. Flake, II, Elena Hitraya, Cheryl L. Chin, Rotem Ben-Shachar, Alexander Gutin, Jerry S. Lanchbury.

## References

1. DeMizio DJ, Geraldino-Pardilla LB. Autoimmunity and Inflammation Link to Cardiovascular Disease Risk in Rheumatoid Arthritis. *Rheumatol Ther*. 2020; 7[1]:19–33. <https://doi.org/10.1007/s40744-019-00189-0> PMID: 31853784
2. Aviña-Zubieta JA, Choi HK, Sadatsafavi M, Etminan M, Esdaile JM, Lacaille D. Risk of cardiovascular mortality in patients with rheumatoid arthritis: a meta-analysis of observational studies. *Arthritis Rheum*. 2008; 59[12]:1690–7. <https://doi.org/10.1002/art.24092> PMID: 19035419
3. Agca R, Heslinga SC, Rollefstad S, Heslinga M, McInnes IB, Peters MJ, et al. EULAR recommendations for cardiovascular disease risk management in patients with rheumatoid arthritis and other forms of inflammatory joint disorders: 2015/2016 update. *Ann Rheum Dis*. 2017; 76[1]:17–28. <https://doi.org/10.1136/annrheumdis-2016-209775> PMID: 27697765
4. Alemao E, Cawston H, Bourhis F, Al M, Rutten-van Molken M, Liao KP, et al. Comparison of cardiovascular risk algorithms in patients with vs without rheumatoid arthritis and the role of C-reactive protein in predicting cardiovascular outcomes in rheumatoid arthritis. *Rheumatology (Oxford)*. 2017; 56[5]:777–86. <https://doi.org/10.1093/rheumatology/kew440> PMID: 28087832
5. Arts EE, Popa C, Den Broeder AA, Semb AG, Toms T, Kitas GD, et al. Performance of four current risk algorithms in predicting cardiovascular events in patients with early rheumatoid arthritis. *Ann Rheum Dis*. 2015; 74[4]:668–74. <https://doi.org/10.1136/annrheumdis-2013-204024> PMID: 24389293
6. Curtis JR, Xie F, Crowson CS, Sasso EH, Hitraya E, Chin CL, et al. Derivation and internal validation of a multi-biomarker-based cardiovascular disease risk prediction score for rheumatoid arthritis patients. *Arthritis Res Ther*. 2020; 22[1]:282. <https://doi.org/10.1186/s13075-020-02355-0> PMID: 33276814
7. Curtis JR, van der Helm-van Mil AH, Knevel R, Huizinga TW, Haney DJ, Shen Y, et al. Validation of a novel multibiomarker test to assess rheumatoid arthritis disease activity. *Arthritis care & research*. 2012; 64[12]:1794–803. <https://doi.org/10.1002/acr.21767> PMID: 22736476
8. England BR, Tiong BK, Bergman MJ, Curtis JR, Kazi S, Mikuls TR, et al. 2019 Update of the American College of Rheumatology Recommended Rheumatoid Arthritis Disease Activity Measures. *Arthritis care & research*. 2019; 71[12]:1540–55. <https://doi.org/10.1002/acr.24042> PMID: 31709779

9. Reiss WG, Devenport JN, Low JM, Wu G, Sasso EH. Interpreting the multi-biomarker disease activity score in the context of tocilizumab treatment for patients with rheumatoid arthritis. *Rheumatol Int.* 2016; 36[2]:295–300. <https://doi.org/10.1007/s00296-015-3285-2> PMID: 26026604
10. Curtis JR, Flake DD, Weinblatt ME, Shadick NA, Ostergaard M, Hetland ML, et al. Adjustment of the multi-biomarker disease activity score to account for age, sex and adiposity in patients with rheumatoid arthritis. *Rheumatology.* 2019; 58[5]:874–83. <https://doi.org/10.1093/rheumatology/key367> PMID: 30590790
11. Therneau TM, Lumley T, Atkinson E, Cynthia C. A Package for Survival Analysis in R. R package version 3.1–11.: <https://CRAN.R-project.org/package=survival>. Accessed March 25, 2020; 2020.
12. Team RC. R: A Language and Environment for Statistical Computing. R Foundation for Statistical Computing, Vienna. (2018).
13. Grundy SM, Stone NJ, Bailey AL, Beam C, Birtcher KK, Blumenthal RS, et al. 2018 AHA/ACC/AACVPR/AAPA/ABC/ACPM/ADA/AGS/APhA/ASPC/NLA/PCNA Guideline on the Management of Blood Cholesterol: A Report of the American College of Cardiology/American Heart Association Task Force on Clinical Practice Guidelines. *Circulation.* 2019; 139(25):e1082–e143. <https://doi.org/10.1161/CIR.0000000000000625> PMID: 30586774
14. Solomon DH, Goodson NJ, Katz JN, Weinblatt ME, Avorn J, Setoguchi S, et al. Patterns of cardiovascular risk in rheumatoid arthritis. *Ann Rheum Dis.* 2006; 65[12]:1608–12. <https://doi.org/10.1136/ard.2005.050377> PMID: 16793844
15. Crowson CS, Rollefstad S, Ikdahl E, Kitas GD, van Riel P, Gabriel SE, et al. Impact of risk factors associated with cardiovascular outcomes in patients with rheumatoid arthritis. *Ann Rheum Dis.* 2018; 77[1]:48–54. <https://doi.org/10.1136/annrheumdis-2017-211735> PMID: 28877868
16. Ljung L, Ueda P, Liao KP, Greenberg JD, Etzel CJ, Solomon DH, et al. Performance of the Expanded Cardiovascular Risk Prediction Score for Rheumatoid Arthritis in a geographically distant National Register-based cohort: an external validation. *RMD open.* 2018; 4[2]:e000771. <https://doi.org/10.1136/rmdopen-2018-000771> PMID: 30622736
17. Solomon DH, Greenberg J, Curtis JR, Liu M, Farkouh ME, Tsao P, et al. Derivation and internal validation of an expanded cardiovascular risk prediction score for rheumatoid arthritis: a Consortium of Rheumatology Researchers of North America Registry Study. *Arthritis & rheumatology (Hoboken, NJ).* 2015; 67[8]:1995–2003. <https://doi.org/10.1002/art.39195> PMID: 25989470
18. Crowson CS, Rollefstad S, Kitas GD, van Riel PL, Gabriel SE, Semb AG. Challenges of developing a cardiovascular risk calculator for patients with rheumatoid arthritis. *PloS one.* 2017; 12[3]:e0174656. <https://doi.org/10.1371/journal.pone.0174656> PMID: 28334012
19. Yang C, Williams RD, Swerdel JN, Almeida JR, Brouwer ES, Burn E, et al. Development and external validation of prediction models for adverse health outcomes in rheumatoid arthritis: A multinational real-world cohort analysis. *Seminars in arthritis and rheumatism.* 2022; 56:152050. <https://doi.org/10.1016/j.semarthrit.2022.152050> PMID: 35728447
